# Supplementary material
Source: PubMed Central journal article supplement (PMC5846344)

G-MDSC (CD15<sup>+</sup>CD33<sup>+</sup>CD11b<sup>+</sup>CD14<sup>-</sup>HLA-DR<sup>low</sup>) gating

**A**

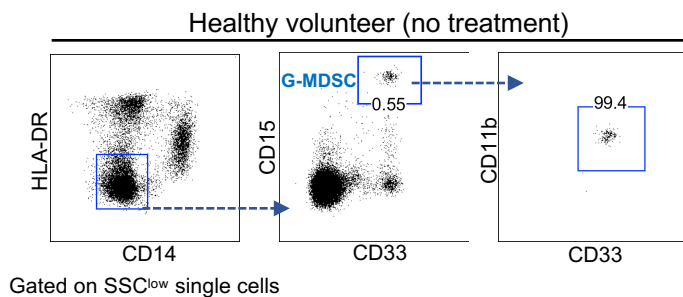

**B**

RGX-104 clinical trial patient 1 (pre-treatment)

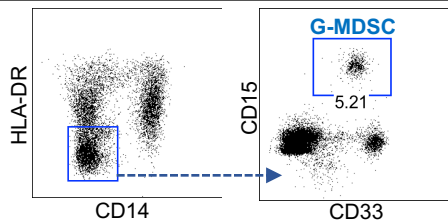

RGX-104 clinical trial patient 1 (week 2 of treatment)

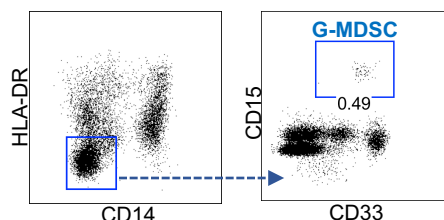

M-MDSC (CD14<sup>+</sup>Lin<sup>neg</sup>HLA-DR<sup>low</sup>) gating

**C**

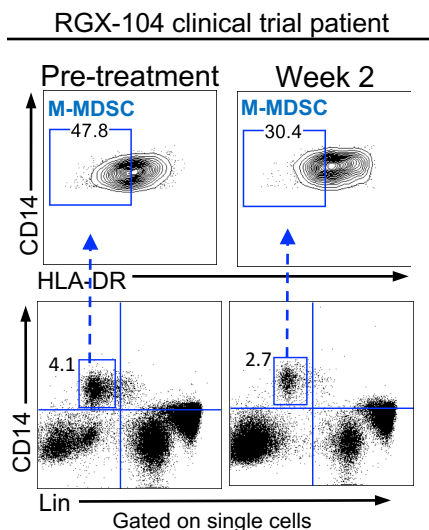

Tumor MDSC

**D**

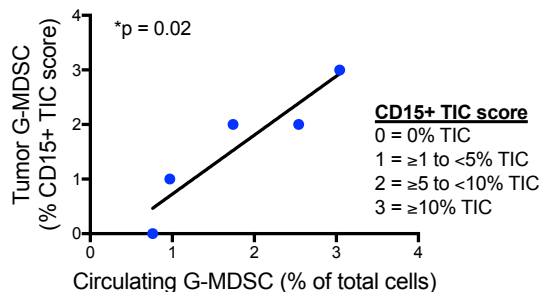

**E**

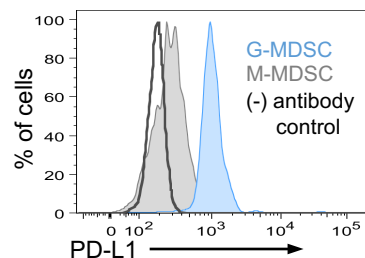

Activated T cells (GITR<sup>+</sup>CD8<sup>+</sup>CD3<sup>+</sup>) gating

**F**

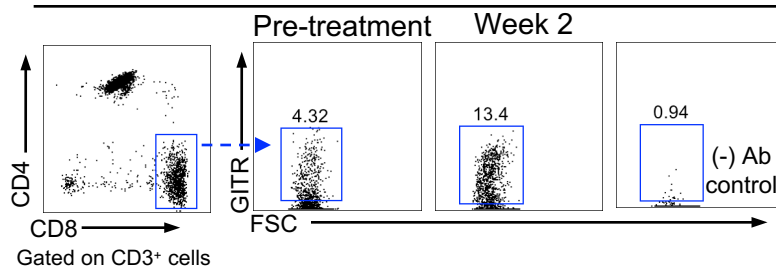

Supplement: NIHMS933638-supplement-7.pdf [file NIHMS933638-supplement-7.pdf]
