# Supplementary material
Source: PubMed Central journal article supplement (PMC5846344)

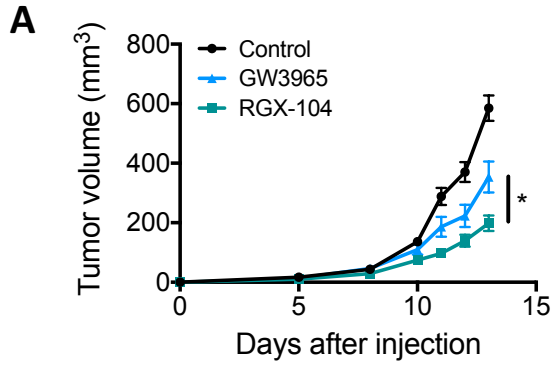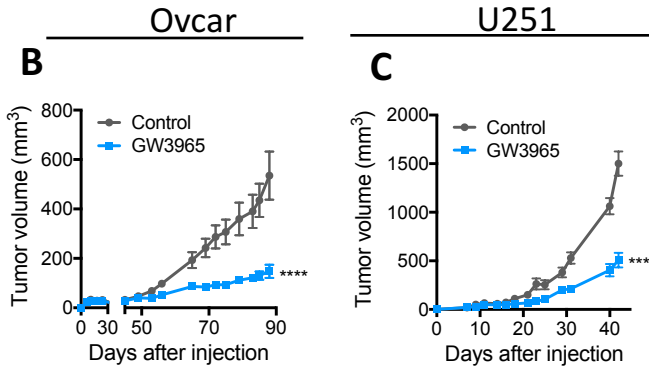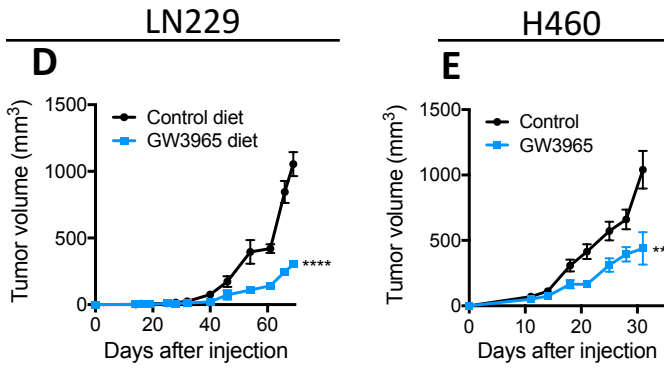

**F** **Lewis Lung**  
*Lung metastasis*

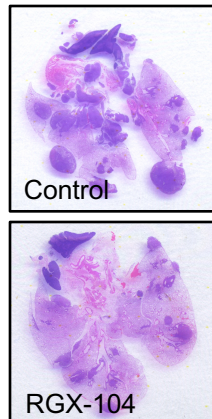

Supplement: NIHMS933638-supplement-2.pdf [file NIHMS933638-supplement-2.pdf]

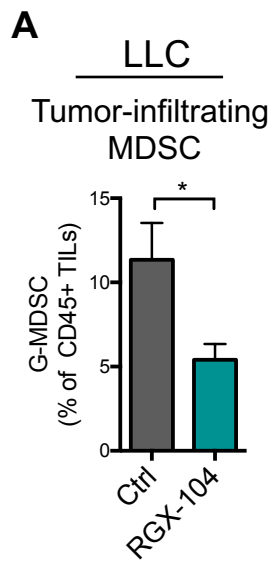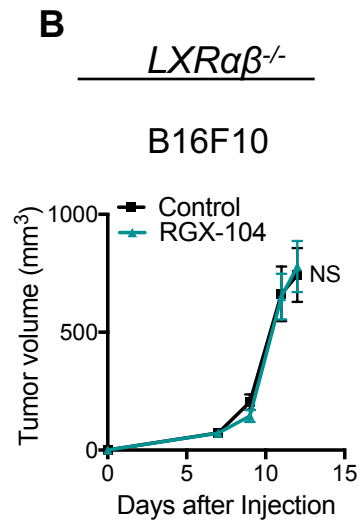

Supplement: NIHMS933638-supplement-3.pdf [file NIHMS933638-supplement-3.pdf]

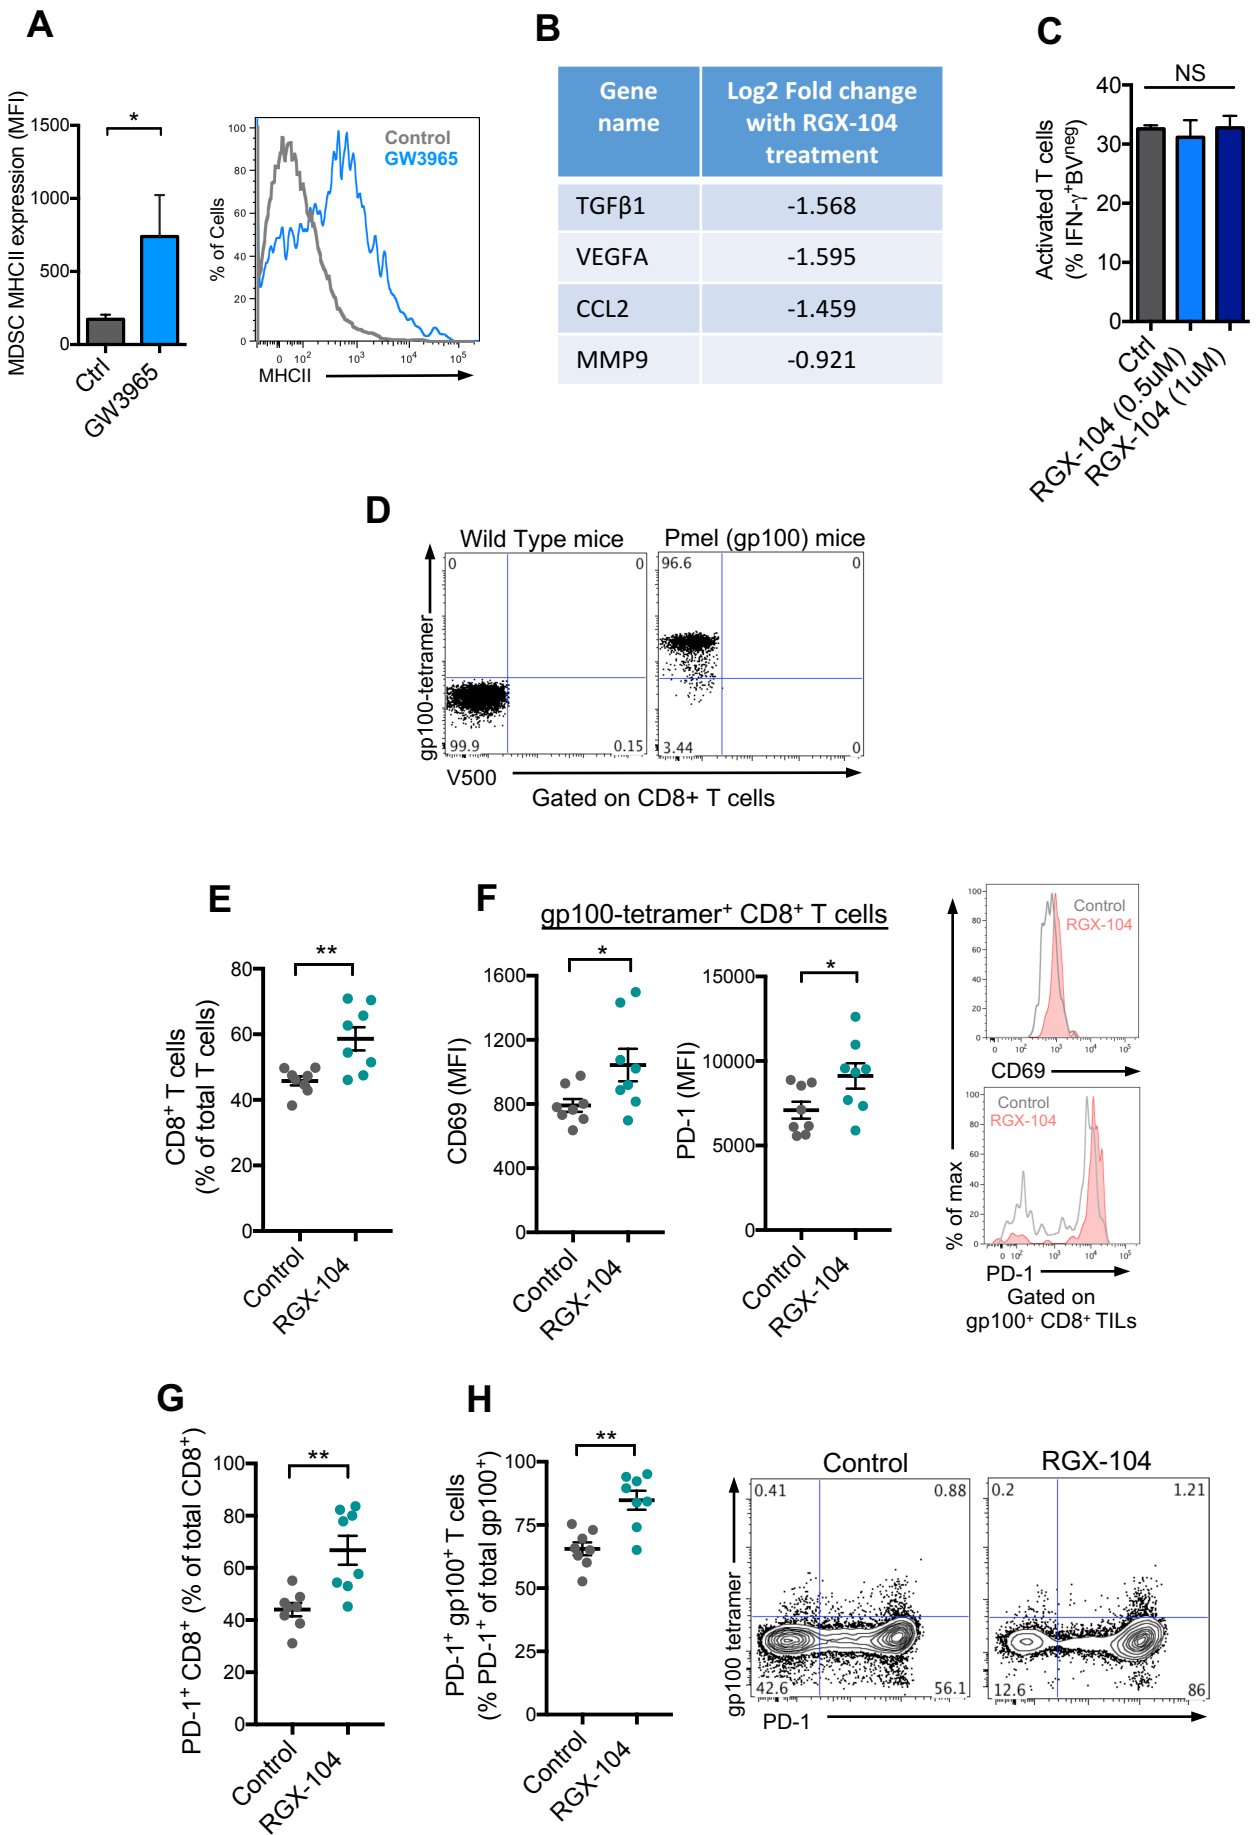

Supplement: NIHMS933638-supplement-4.pdf [file NIHMS933638-supplement-4.pdf]

**A**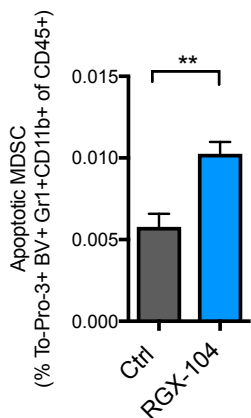**B**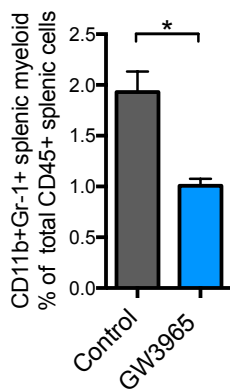**C**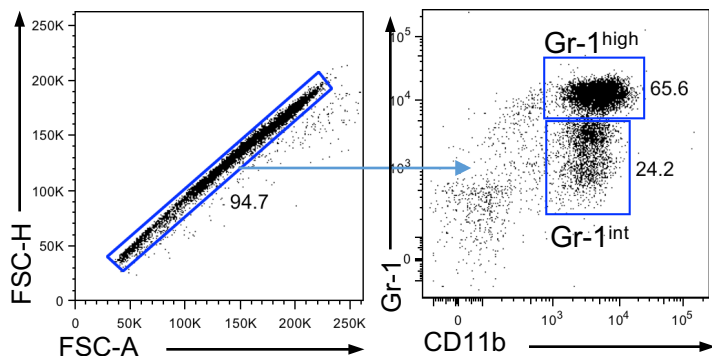**D**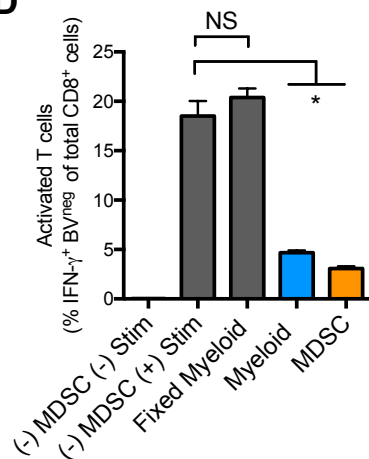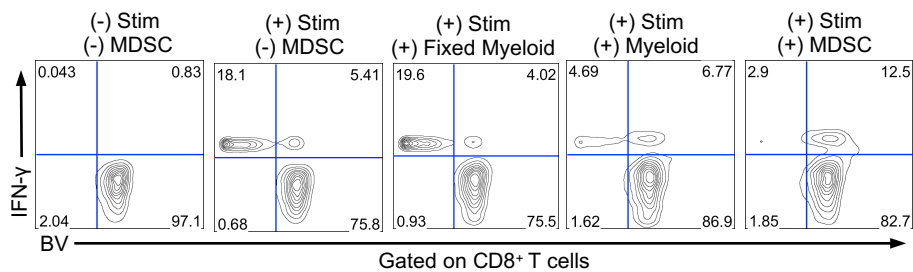**E**

Bone Marrow G-MDSC

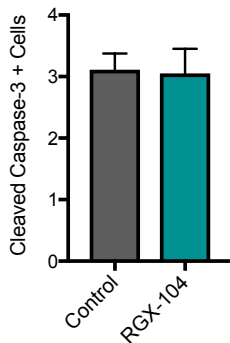**F**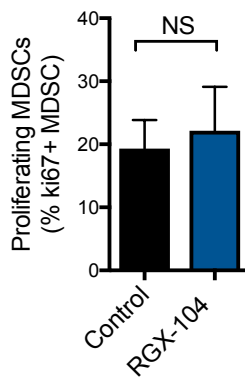**G**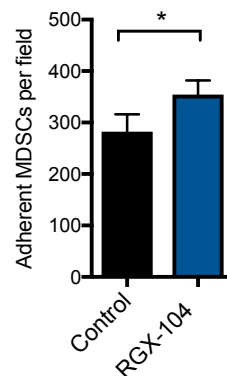

Supplement: NIHMS933638-supplement-5.pdf [file NIHMS933638-supplement-5.pdf]

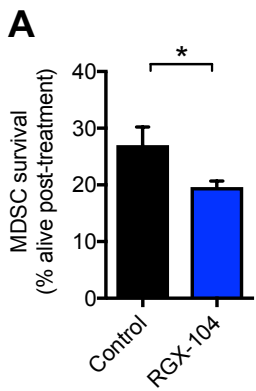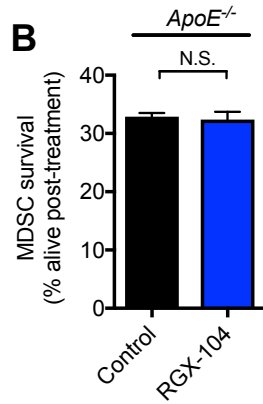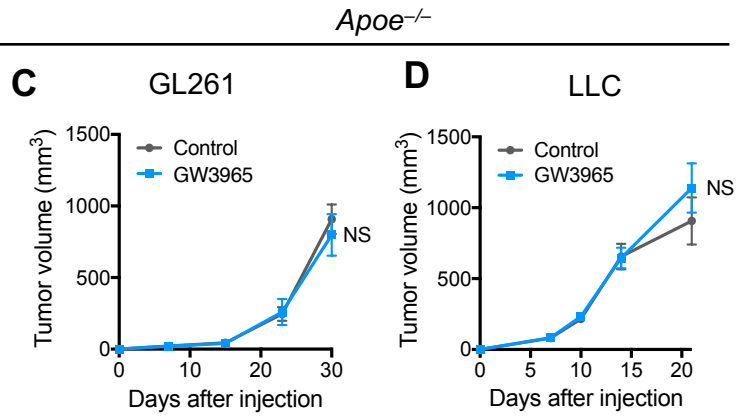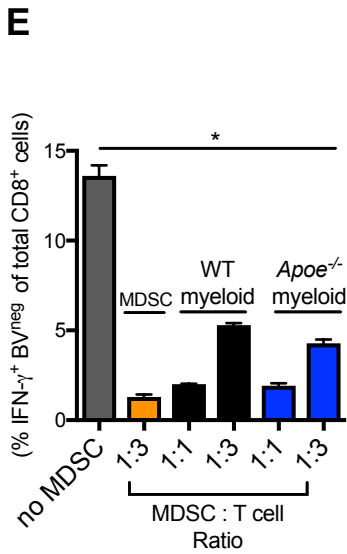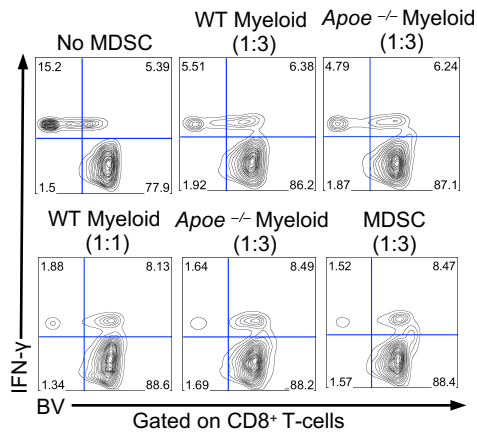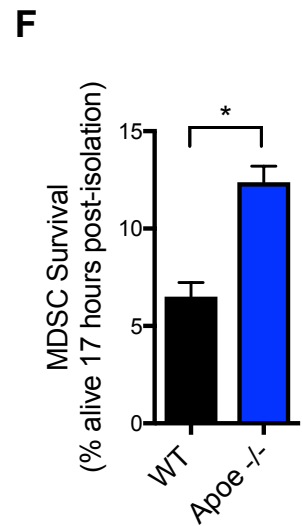

**G** Bone Marrow G-MDSC

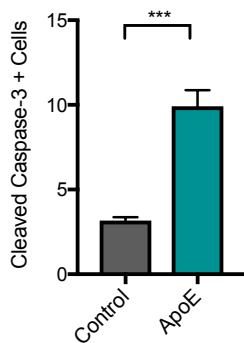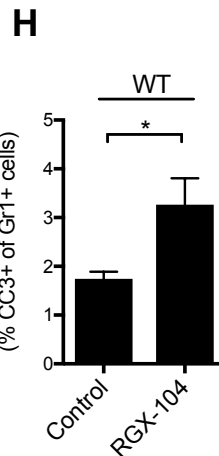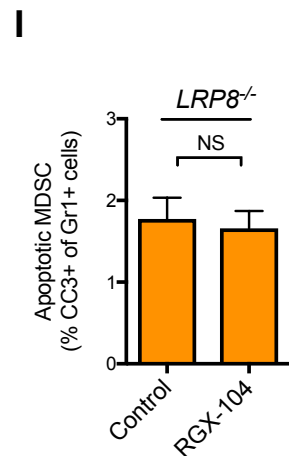

Supplement: NIHMS933638-supplement-6.pdf [file NIHMS933638-supplement-6.pdf]
